# Supplementary material for: Influence of reduction temperature on Pt–ZrO2 interfaces for the gas-phase hydrogenation of acetone to isopropanol
Source: Royal Society of Chemistry journal article supplement (doi:10.1039/d2cy02139k), 2023-01-01
Supplement: d2cy02139k1.pdf [file d2cy02139k1.pdf]

## Supporting Information

### **Influence of reduction temperature on Pt-ZrO<sub>2</sub> interface for the gas-phase hydrogenation of acetone to isopropanol**

Kun Liu,<sup>a#</sup> Tingting Zhang,<sup>b#</sup> Xiaodong Liu,<sup>c</sup> Tingyu Wang,<sup>a</sup> Yan Su,<sup>a</sup> Hong Wang,<sup>a</sup>  
Liping Sun,<sup>a</sup> Xiaoqun Cao,<sup>a</sup> Yushui Bi,<sup>a\*</sup> Kaiqi Wang,<sup>a\*</sup> Li Zhang<sup>d\*</sup>

<sup>a</sup>Institute of Optical Functional Materials for Biomedical Imaging, School of Chemistry and Pharmaceutical Engineering, Shandong First Medical University & Shandong Academy of Medical Sciences, Taian 271016, China

<sup>b</sup>School of foreign languages, Shandong First Medical University & Shandong Academy of Medical Sciences, Taian 271016, China

<sup>c</sup>Tarim Oilfield Branch Company of PetroChina, Kuerle 841000, China

<sup>d</sup>College of Chemistry and Chemical Engineering, Taishan University, Taian 271000, China

\*Corresponding authors

#The authors contribute equally to this work

E-mail addresses: *ysbi@sdfmu.edu.cn* (Y. Bi), *wangkaiqi@sdfmu.edu.cn* (K. Wang),  
*zhangli06688@163.com* (L. Zhang)

**Table S1.** Quantitative analysis of H<sub>2</sub> consumption in H<sub>2</sub>-TPR.

| Catalyst             | H <sub>2</sub> consumption (mmol g <sup>-1</sup> ) <sup>a</sup> | Mono-layers ZrO <sub>2</sub> reduced by H <sub>2</sub> <sup>b</sup> |
|----------------------|-----------------------------------------------------------------|---------------------------------------------------------------------|
| ZrO <sub>2</sub>     | 0.018                                                           | 0.7                                                                 |
| 1Pt/ZrO <sub>2</sub> | 0.021                                                           | 0.8                                                                 |
| 2Pt/ZrO <sub>2</sub> | 0.029                                                           | 1.1                                                                 |
| 3Pt/ZrO <sub>2</sub> | 0.061                                                           | 2.3                                                                 |
| 4Pt/ZrO <sub>2</sub> | 0.066                                                           | 2.5                                                                 |
| 5Pt/ZrO <sub>2</sub> | 0.069                                                           | 2.6                                                                 |

<sup>a</sup>H<sub>2</sub> consumed at 400-500 °C for pure ZrO<sub>2</sub> and 100-300 °C for Pt/ZrO<sub>2</sub> catalysts.

<sup>b</sup>Calculated based on BET-SSAs.

**Table S2.** Pt particle size, Pt content, and specific surface area of the fresh and used catalysts.

| Catalyst                  | D <sub>Pt</sub> <sup>a</sup> (nm) |      | Pt content <sup>b</sup> (wt%) |      | SSA <sup>c</sup> (m <sup>2</sup> g <sup>-1</sup> ) |      |
|---------------------------|-----------------------------------|------|-------------------------------|------|----------------------------------------------------|------|
|                           | Fresh                             | Used | Fresh                         | Used | Fresh                                              | Used |
| 3Pt/ZrO <sub>2</sub> -100 | 9.3                               | 9.6  | 2.9                           | 2.8  | 11                                                 | 11   |
| 3Pt/ZrO <sub>2</sub> -200 | 9.5                               | 9.7  | 2.8                           | 2.9  | 12                                                 | 12   |
| ZrO <sub>2</sub> -400     | -                                 | -    | -                             | -    | 10                                                 | 11   |
| ZrO <sub>2</sub> -450     | -                                 | -    | -                             | -    | 11                                                 | 10   |

<sup>a</sup>Particle size of Pt was calculated by Pt(111) XRD peak (Figs. 2A and S7A) using the Scherrer equation (“Part I: Estimation of particle size” in the last page in supporting information).

<sup>b</sup>Pt content was detected by ICP-AES.

<sup>c</sup>SSA: specific surface area.

**Table S3.** The turnover frequencies (TOFs) of acetone hydrogenation over the catalysts based on Pt NPs<sup>a</sup>.

| Catalyst                  | $V_{\text{total}}^b$<br>( $\times 10^{-4}$ , cm <sup>3</sup> ) | $D_{\text{Pt}}^c$<br>(nm) | $V_{\text{Pt-particle}}^d$<br>(nm <sup>3</sup> ) | Amount of<br>Pt Particles<br>( $\times 10^{14}$ ) | $S_{\text{Pt-particle}}^e$<br>(nm <sup>2</sup> ) | $S_{\text{total}}$<br>(cm <sup>2</sup> ) | Amount of<br>Surface Pt<br>Atoms <sup>e</sup> ( $\times 10^{18}$ ) | Conv. <sup>f</sup><br>(%) | $N^g$<br>( $\times 10^{22}$ ) | TOF<br>(h <sup>-1</sup> ) |
|---------------------------|----------------------------------------------------------------|---------------------------|--------------------------------------------------|---------------------------------------------------|--------------------------------------------------|------------------------------------------|--------------------------------------------------------------------|---------------------------|-------------------------------|---------------------------|
| 3Pt/ZrO <sub>2</sub> -100 | 3.5                                                            | 9.3                       | 210                                              | 17                                                | 136                                              | 2312                                     | 3.16                                                               | 8                         | 2.04                          | 6455                      |
| 3Pt/ZrO <sub>2</sub> -200 | 3.5                                                            | 9.5                       | 224                                              | 16                                                | 142                                              | 2272                                     | 3.11                                                               | 11.8                      | 3.06                          | 9839                      |

<sup>a</sup>For each catalyst, 0.25 g was used in testing experiments; <sup>b</sup>The total volume of Pt ( $V_{\text{total}}$ ) is calculated as: Pt mass (0.25 g  $\times$  Pt-loading (wt%)) is divided by the Pt density (21.45 g/cm<sup>3</sup>); <sup>c</sup>The particle size is estimated from XRD patterns using Scherrer's equation; <sup>d</sup>The Pt particles are assumed as hemisphere, and the volume of single Pt particle is  $\pi D_{\text{Pt}}^3/12$ , and the surface area is  $\pi D_{\text{Pt}}^2/2$ ; <sup>e</sup>The distance between the adjacent Pt atoms is 0.27 nm, and one Pt atom occupies the surface area of 0.073 (0.27  $\times$  0.27 = 0.073) nm<sup>2</sup>; <sup>f</sup>The weight hourly space velocity (WHSV) = 100 h<sup>-1</sup>, and 25 g acetone was fed into the reactor; <sup>g</sup>Amount of converted acetone (Take the converted acetone over the catalyst 3Pt/ZrO<sub>2</sub>-100 as example: the converted benzyl alcohol in one hour is 2 g (25  $\times$  0.08 = 2 g), and the converted amount of benzyl alcohol molecule is  $2.04 \times 10^{22}$  (2 (g)  $\div$  58 (g/mol) = 0.034 mol; 0.034  $\times$  6.02  $\times 10^{23}$  =  $2.04 \times 10^{22}$ )).

**Table S4.** Reaction rates of the catalysts<sup>a</sup>.

| Catalyst                  | SSA <sup>b</sup> (m <sup>2</sup> g <sup>-1</sup> ) | T <sup>c</sup> (°C) | Conv. <sup>d</sup> (%) | N <sup>e</sup> (mmol) | Reaction rate<br>(mmol m <sup>-2</sup> h <sup>-1</sup> ) |
|---------------------------|----------------------------------------------------|---------------------|------------------------|-----------------------|----------------------------------------------------------|
| 3Pt/ZrO <sub>2</sub> -100 | 11                                                 | 60                  | 8.0                    | 34                    | 12                                                       |
| 3Pt/ZrO <sub>2</sub> -200 | 12                                                 | 60                  | 11.8                   | 50                    | 17                                                       |
| ZrO <sub>2</sub> -450     | 10                                                 | 60                  | 0.4                    | 1.7                   | 0.7                                                      |

<sup>a</sup>For each catalyst, 0.25 g was used in testing experiments and WHSV is 100 h<sup>-1</sup>; <sup>b</sup>Specific surface area of the catalyst; <sup>c</sup>Reaction temperature; <sup>d</sup>acetone conversion; <sup>e</sup>Number of converted acetone; <sup>f</sup>Reaction rate based on the surface area of Pt NPs.

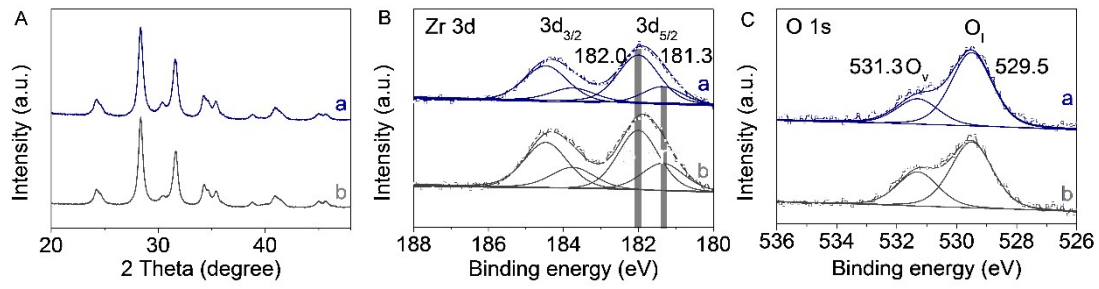

**Fig. S1.** XRD patterns (A), Zr 3d (B), and O 1s (C) XPS spectra of ZrO<sub>2</sub>-400 (a) and ZrO<sub>2</sub>-450 (b).

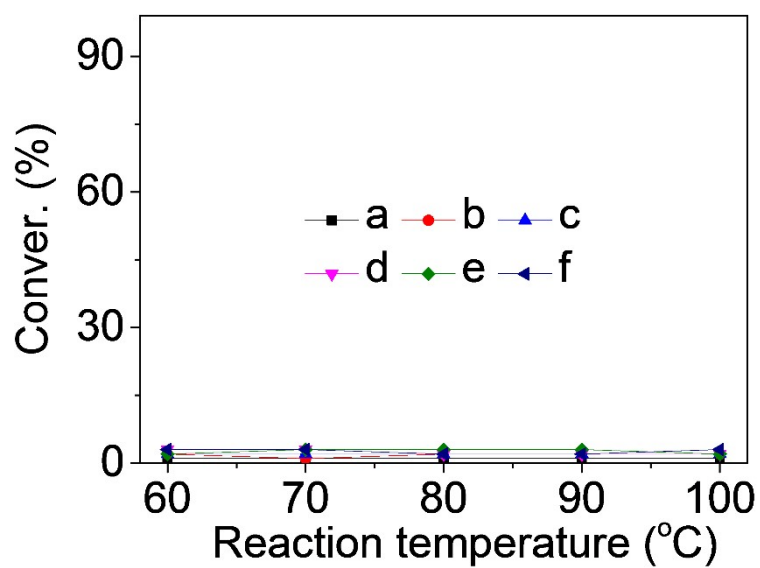

**Fig. S2.** Effect of reduction temperature on acetone conversion for  $\text{ZrO}_2$  at 80 °C,  $\text{H}_2$ /acetone molar ratio of 2 and WHSV of 10  $\text{h}^{-1}$  (IPA selectivity: 98%-99%, not shown, (a) unreduced, (b) 100 °C, (c) 200 °C, (d) 400 °C, (e) 450 °C, and (f) 500 °C).

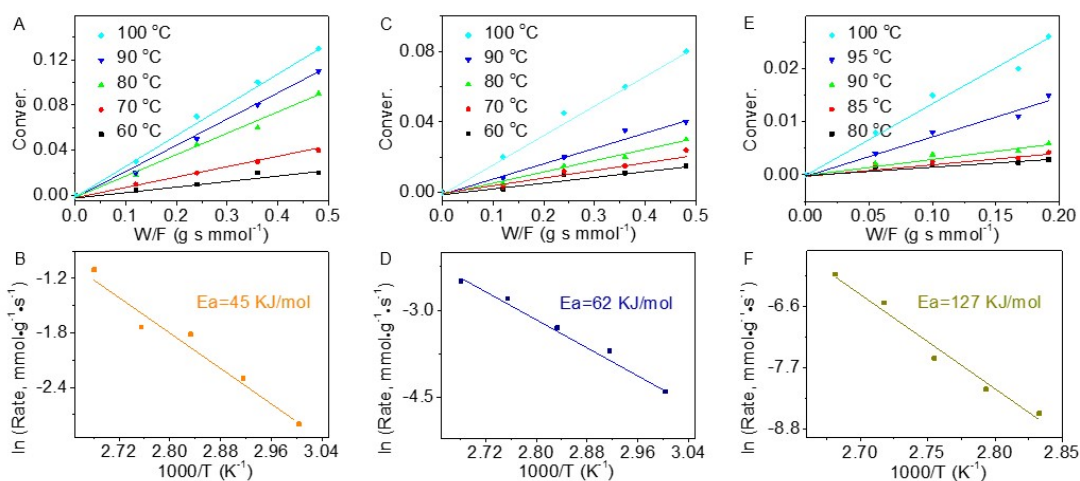

**Fig. S3.** Variation of the conversion of acetone to IPA against  $W/F_{\text{acetone}}$  for the reduced catalysts (A) 3Pt/ZrO<sub>2</sub>-200, (C) 3Pt/ZrO<sub>2</sub>-100, and (E) ZrO<sub>2</sub>-450.  $\ln(\text{Rate})$  as a function of  $1000/T$  for the reduced catalysts (B) 3Pt/ZrO<sub>2</sub>-200, (D) 3Pt/ZrO<sub>2</sub>-100, and (F) ZrO<sub>2</sub>-450.

For reduced 3Pt/ZrO<sub>2</sub>-200, 250 mg catalyst and 250 mg SiO<sub>2</sub> were loaded into the reactor. Acetone, H<sub>2</sub>, and N<sub>2</sub> with molar ratio of 1/2/4 were fed into the reactor jointly. WHSV was higher than 100 h<sup>-1</sup> in order to guarantee that acetone conversion is lower than 20%. We plotted the line according to W/F (X axis; W is the weight of catalyst and F is the flow rate of acetone) as well as acetone conversion (Y axis) (Fig. S3A). The slope of line is the reaction rate (unit of mmol g<sup>-1</sup> s<sup>-1</sup>). According to Arrhenius's formula:

$$\ln k = -\frac{E_a}{R} + \ln A$$

We plotted the line according to  $1000/T$  (X axis; T is kelvin temperature) as well as the natural logarithm of reaction rate (Y axis). The slope of line is  $-E_a/R$  ( $E_a$  with the unit of kJ mol<sup>-1</sup>) (Fig. S3B).

For 3Pt/ZrO<sub>2</sub>-100 and ZrO<sub>2</sub>-450, similar method is used to calculate activation energy by tuning W/F values and reaction temperatures.



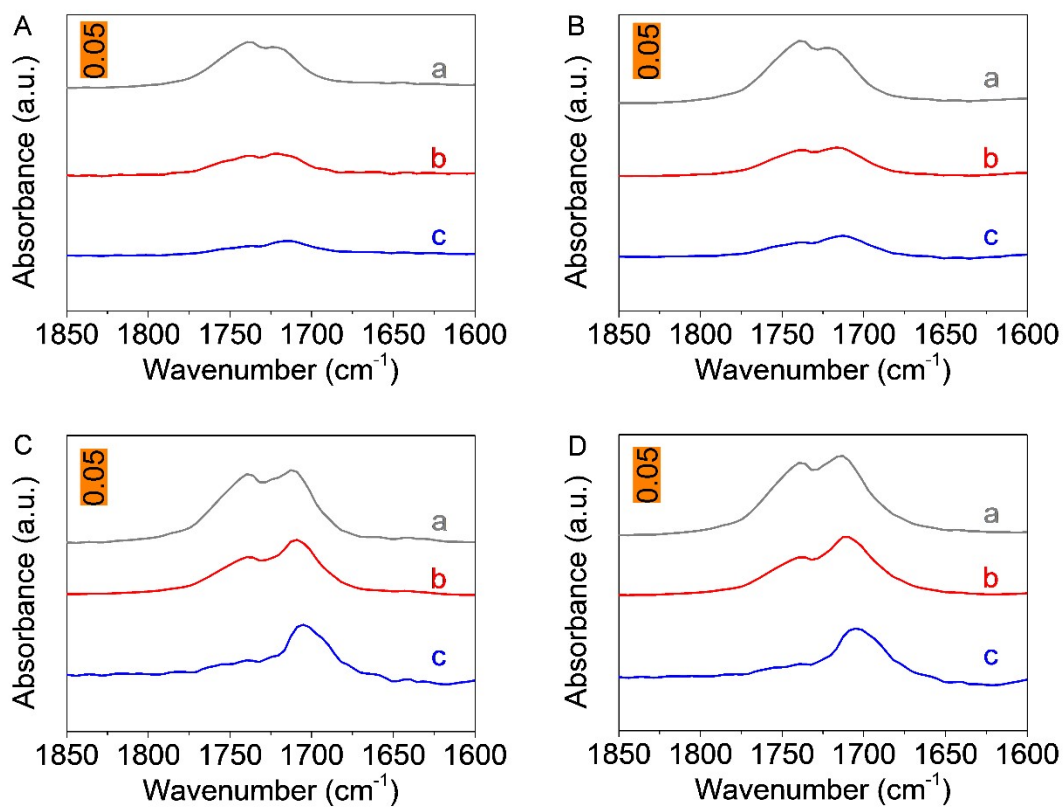

**Fig. S4.** *In-situ* FT-IR spectra of acetone adsorbed on (A) unreduced ZrO<sub>2</sub>, and ZrO<sub>2</sub> reduced at (B) 400, (C) 450, and (F) 500 °C (Line a: purging for 5 min; line b: purging for 10 min; line c: purging for 20 min).

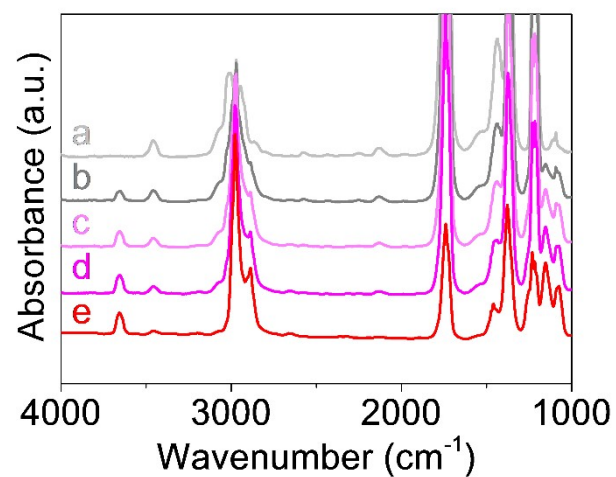

**Fig. S5.** *In-situ* FT-IR spectra of acetone hydrogenation on 3Pt/ZrO<sub>2</sub>-200 (Line a: introducing acetone at room temperature; line b: reaction at 80 °C for 1 min; line c: reaction at 80 °C for 5 min; line d: reaction at 80 °C for 10 min; line e: reaction at 80 °C for 30 min).

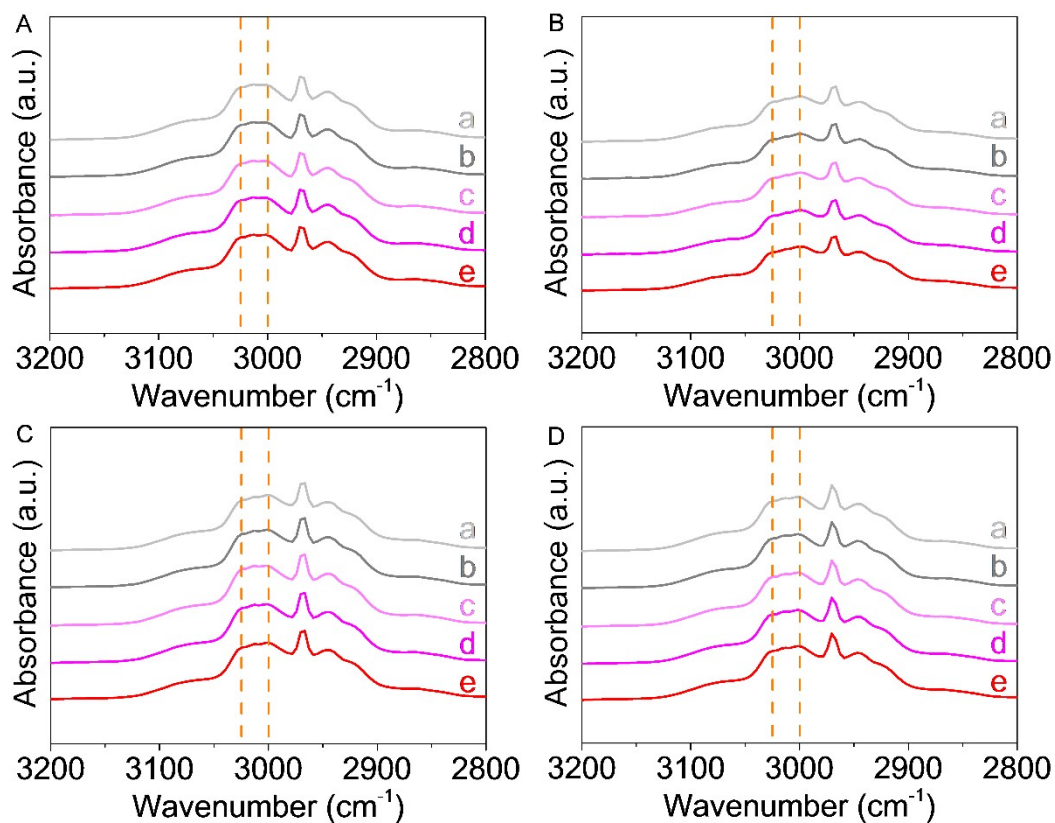

**Fig. S6.** *In-situ* FT-IR spectra of acetone hydrogenation on (A) unreduced ZrO<sub>2</sub>, and ZrO<sub>2</sub> reduced at (B) 400, (C) 450, and (D) 500 °C (Line a: introducing acetone at room temperature; line b: reaction at 80 °C for 1 min; line c: reaction at 80 °C for 5 min; line d: reaction at 80 °C for 10 min; line e: reaction at 80 °C for 30 min).

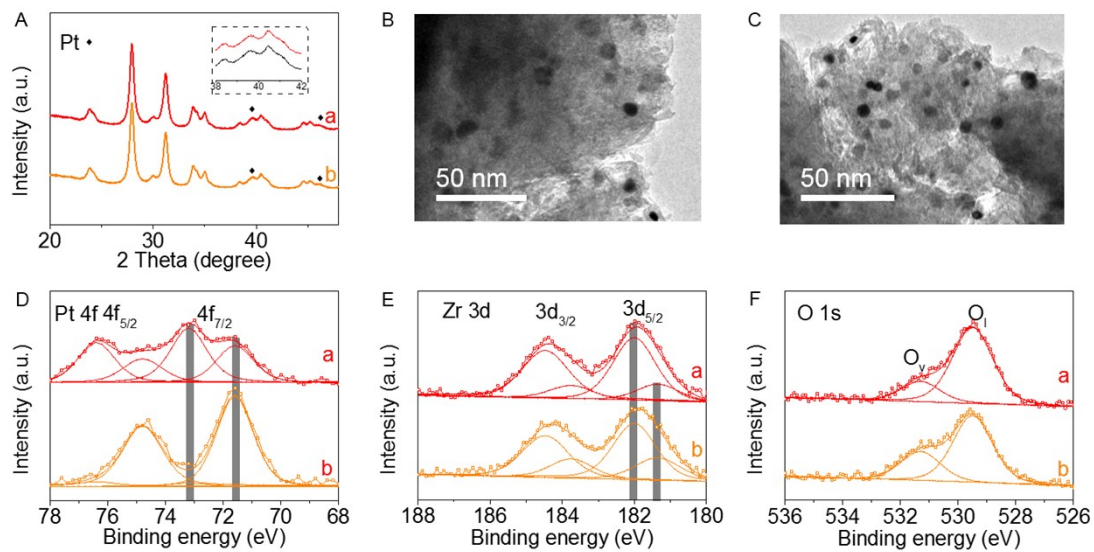

**Fig. S7.** (A) XRD patterns of used 3Pt/ZrO<sub>2</sub>-100 (a), and 3Pt/ZrO<sub>2</sub>-200 (b). TEM images of used 3Pt/ZrO<sub>2</sub>-100 (B), and 3Pt/ZrO<sub>2</sub>-200 (C). (D) Pt 4f, (E) Zr 3d, and (F) O 1s XPS spectra of used 3Pt/ZrO<sub>2</sub>-100, (a) and 3Pt/ZrO<sub>2</sub>-200 (b).

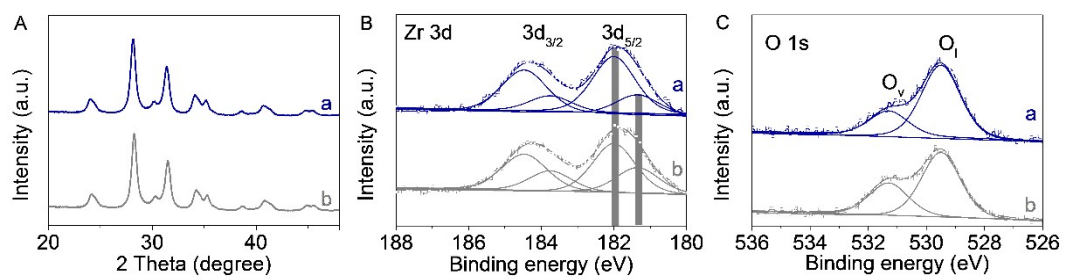

**Fig. S8.** (A) XRD patterns, (B) Zr 3d XPS spectra, and (C) O 1s XPS spectra of used ZrO<sub>2</sub>-400 (a) and ZrO<sub>2</sub>-450 (b).

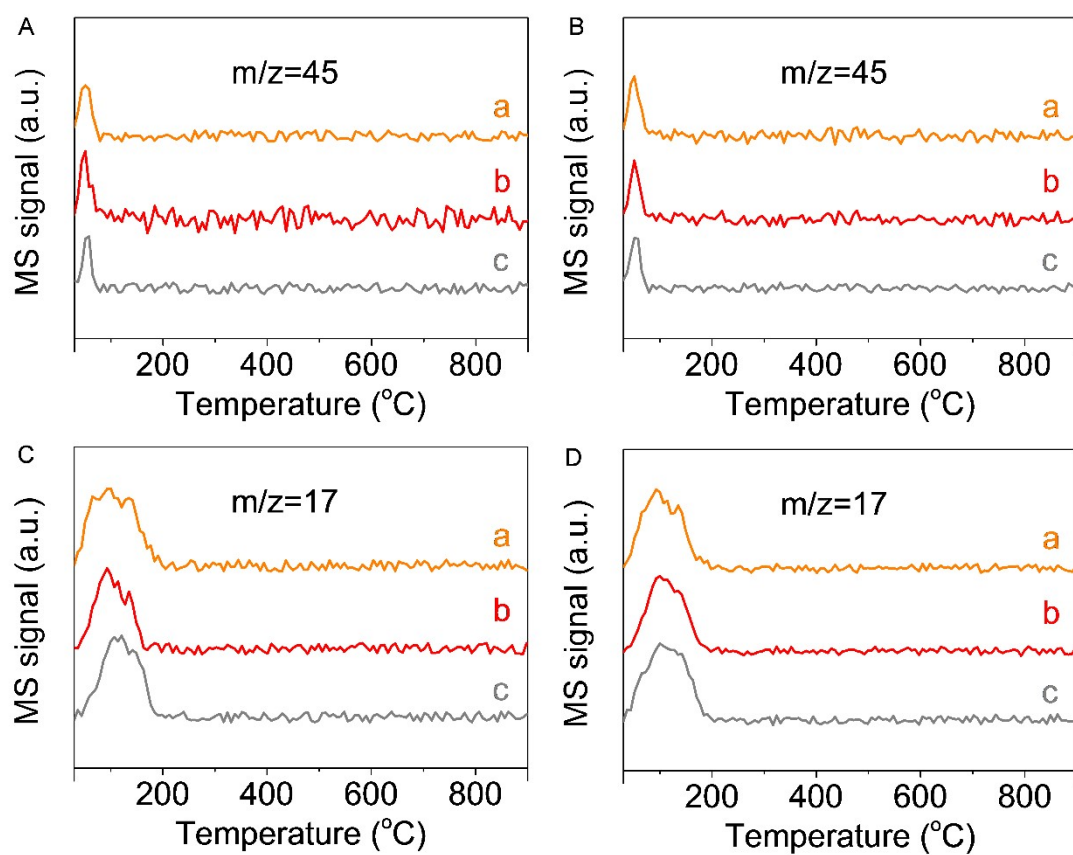

**Fig. S9.** IPA-TPD-MS profiles of (A) fresh, and (B) used catalysts. NH<sub>3</sub>-TPD-MS profiles of (C) fresh, and (D) used catalysts. ((a) 3Pt/ZrO<sub>2</sub>, (b) 3Pt/ZrO<sub>2</sub>-100, (c) 3Pt/ZrO<sub>2</sub>-200).

## Part I: Estimation of particle size

In this work, the diffraction peaks of Pt and ZrO<sub>2</sub> are overlapped, but the XRD patterns could be fitted using PEAKFIT program and the particle sizes could be estimated [1] using Scherrer equation based on Pt(111) peaks at 39.6°. As shown in Fig. IA,B, FWHMs (full width at half maximums) are 0.89, 0.87, 0.88, and 0.86° for reduced 3Pt/ZrO<sub>2</sub>-100, used 3Pt/ZrO<sub>2</sub>-100, reduced 3Pt/ZrO<sub>2</sub>-200, and used 3Pt/ZrO<sub>2</sub>-200, respectively, so their particle sizes are calculated to be 9.3, 9.6, 9.5, and 9.7 nm (Table S2 in SI), respectively, being close to each other.

Moreover, the histograms of the Pt particle sizes based on TEM results are exhibited in Fig. IC-F, showing ~8-10 nm Pt particle sizes and corresponding well with XRD results.

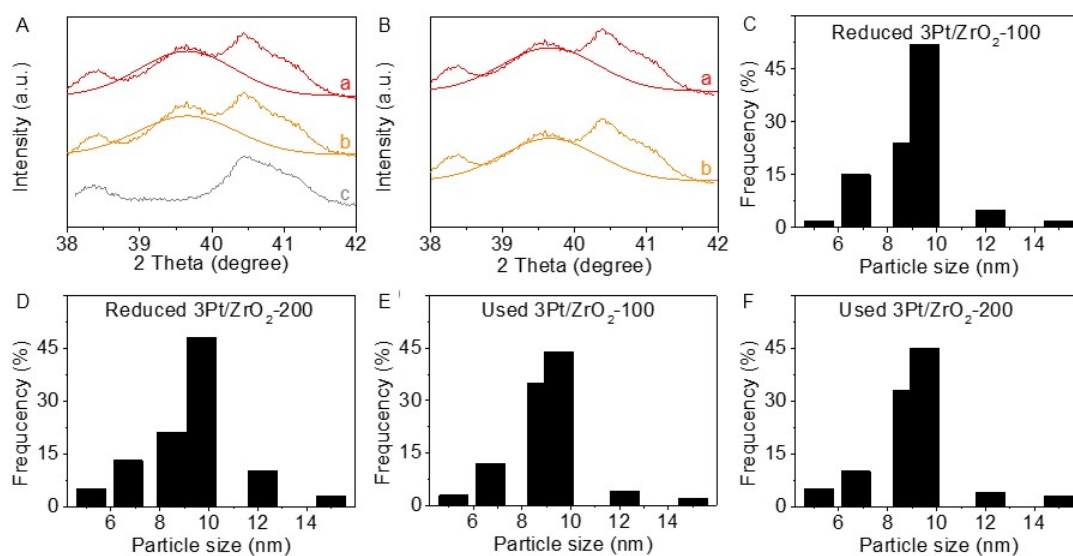

**Fig. I.** Particle sizes of the catalysts. (Fitted XRD patterns of reduced (A) and used (B) catalysts (a: 3Pt/ZrO<sub>2</sub>-100, b: 3Pt/ZrO<sub>2</sub>-200, c: ZrO<sub>2</sub>-450); particle size distributions of Pt nanoparticles for reduced 3Pt/ZrO<sub>2</sub>-100 (C), reduced 3Pt/ZrO<sub>2</sub>-200 (D), used 3Pt/ZrO<sub>2</sub>-100 (E), and used 3Pt/ZrO<sub>2</sub>-200 (F)).

[1] K. Liu, Y. Zhao, J. Wang, Q. Xue, G. Zhao, Catal. Sci. Technol., 2020, **10**, 8445.
